# Supplementary material for: Resistance exercise protects mice from protein-induced fat accretion
Source: eLife. 2023 Nov 29;12:RP91007. doi: 10.7554/eLife.91007 (PMC10686620; doi:10.7554/eLife.91007)
Supplement: Figure 1—source data 1. [file elife-91007-fig1-data1.xlsx]

## Sheet: 1B
g/mouse/day
	LP								HP
Sham	2.6046	2.7391	2.4012	2.4342	2.6855	2.5355	2.5918	2.5876	2.1642	2.089	2.3365	2.335	2.2203	2.2142	2.3122	2.2524
WP	2.0864	2.1777	2.3549	2.168	2.5523	2.5678	3.3997	3.2922	2.3602	2.3853	2.5329	2.5243	2.1195	2.0962	1.919	1.9361
g/g BW/day
	LP								HP
Sham	0.102543	0.109127	0.099635	0.119324	0.105728	0.104342	0.112687	0.102277	0.090552	0.084234	0.082562	0.082801	0.095703	0.083241	0.086925	0.081609
WP	0.079634	0.098538	0.099363	0.098545	0.107692	0.109268	0.14591	0.158279	0.106315	0.094655	0.095222	0.099775	0.095473	0.079402	0.075551	0.080004

## Sheet: 1C
Body weight (g)
Week	Low Protein								High Protein								Low Protein WP								High Protein WP
0	26.8	26.3	23.6	19.2	24.8	24.2	23	25.6	24	22.7	24.8	24.5	22.7	24.2	24.8	23.5	23.3	21.2	25.2	25	23.8	22.2	27.6	23.5	22.7		26.3	24.55	21.7	25.6	24.4	23.4
3	24.2	24.5	25.3	19.5	24.2	23.1	22.8	24.8	23.7	23.7	27.7	27	22.5	25.6	26.3	25.2	22.7	22.3	24.4	24.6	23.5	21.2	26	21.9	22.9		26.3	24.9	22.8	26.5	26.3	23.8
6	24.9	25.6	20.7	23.8	24.5	25.3	25.5	23.4	25.4	24.3	28.5	28.5	27.1	23.5	27.4	27.1	20.5	23.1	22.6	23.5	22.1	23.3	21.9	25.5	25.4		25.4	26.9	27.1	23.1	24.2	25.4
9	24.7	24.6	23.1	20.4	24.4	24.2	23	24.9	25	25.1	29.3	29.6	23.7	28	27.5	27.1	22.2	20.6	24.3	23.7	23	21.7	23.9	19.8	23.1		27.2	26.1	23.3	26.2	25.9	24.3
12	25.8	26	24.3	20.7	24.4	24.1	24.8	26.4	26.4	26.1	29.7	31	24.2	28.5	28.7	28.1	23.6	22.6	25.6	25.1	23.2	22.1	26.2	21.9	24.1		29.1	26.9	23.7	26.8	28.5	25.5
15	26.8	26.6	25	21.7	25.2	25.2	26.2	27.7	28	27.8	34.1	33.6	25.8	31	31.4	30.3	24.7	23.4	27.5	26.4	24	23.7	28.3	23.4	26		29.8	28.3	25.1	27.8	30.1	27.4
18	25.7	26.3	24.6	21.3	25.1	25.2	26.4	26.9	27.5	29.1	36.6	36.2	28.1	33.4	31.8	31.6	24.9	24	27.9	25.7	25	23.8	29	23.9	27.8		31.3	29.3	27	30.2	30.1	27.9
delta body weight (g)
	LP								HP
Sham	-1.1	0	1	2.1	0.3	1	3.4	1.3	3.5	6.4	11.8	11.7	5.4	9.2	7	8.1
WP	1.6	2.8	2.7	0.7	1.2	1.6	1.4	0.4	5.1		5	4.75	5.3	4.6	5.7	4.5

## Sheet: 1D
Lean mass (g)
Week	Low Protein								High Protein								Low Protein WP								High Protein WP
0	22.685	23.015	20.145	16.24	21.44	21.155	18.835	22.165	20.415	19.305	20.37	20.5	19.47	20.415	21.165	18.505	19.25	17.2	20.595	20.875	19.78	19.5	23.55	19.915	19.205		22.735	21.275	18.595	22.555	21.405	19.98
3	20.995	21.01	19.56	16.68	20.345	19.675	18.81	20.99	20.8	19.895	22.17	21.685	19.915	21.015	21.23	19.245	19.02	17.425	20.835	19.735	18.755	17.895	20.985	18.755	19.91		23.195	21.78	19.635	23.285	21.815	20.405
6	19.525	20.055	16.645	19.17	18.455	19.31	20.15	18.71	18.495	20.01	20.05	20.095	20.345	19.78	18.72	21.795	15.965	18.575	18.53	19.03	17.245	17.29	17.525	20.395	19.11		21.595	22.585	22.63	19.31	19.54	21.37
9	19.625	20.725	18.725	17.29	20.23	20.14	18.465	21.025	22.035	19.925	21.88	21.635	19.225	21.425	21.835	20.295	18.89	16.94	20.5	18.745	18.475	17.88	20	16.945	19.09		23.865	22.72	19.47	22.63	22.065	20.05
12	19.655	20.845	19.33	17.465	19.38	20.08	19.265	21.275	22.195	20.935	22.32	22.6	19.6	21.64	22.63	20.945	18.895	18.445	20.35	19.885	18.415	18.05	20.58	18.89	19.29		23.75	23.74	19.56	23.315	22.38	20.98
15	20.34	21.19	19.575	18.09	19.405	20.44	20.32	21.98	22.08	21.3	22.485	23.485	20.45	21.355	23.195	21.8	19.36	19.23	21.85	20.725	18.755	19.12	21.385	19.465	20.305		23.83	24.895	20.05	23.595	23.39	20.58
18	20.61	20.71	19.73	17.47	19.395	20.73	19.99	21.675	22.715	21.485	24.61	23.84	21.795	22.845	23.905	22.2	19.815	19.635	21.68	19.6	20.065	18.43	22.57	18.96	20.72		25.705	24.375	21.545	25.475	23.045	21.35
delta lean mass (g)
	LP								HP
Sham	-2.075	-2.305	-0.415	1.23	-2.045	-0.425	1.155	-0.49	2.3	2.18	4.24	3.34	2.325	2.43	2.74	3.695
WP	0.565	2.435	1.085	-1.275	0.285	-1.07	-0.98	-0.955	1.515		2.97	3.1	2.95	2.92	1.64	1.37

## Sheet: 1E
Fat mass (g)
Week	Low Protein								High Protein								Low Protein WP								High Protein WP
0	2.08	1.905	1.625	1.93	1.58	2.33	1.57	2.47	1.745	2.2	2.55	2.815	1.59	2.805	2.81	3.09	2.185	2.905	2.595	3.08	2.3	2.05	3.115	1.85	1.825		1.77	1.865	1.455	1.94	2.065	1.675
3	2.08	2.185	2.475	1.625	2.4	2.445	2.45	2.48	1.72	2.715	4.485	4.125	1.785	3.46	3.72	4.75	2.295	3.515	2.55	3.765	3.595	2.365	3.865	1.995	1.93		1.925	1.845	2.035	1.995	3.21	2
6	3.22	4.145	2.44	3.85	3.975	4.295	3.365	2.875	4.28	2.22	5.58	6.13	4.785	2.525	6.585	3.705	2.42	3.28	3.065	2.335	3.31	3.575	2.695	4.045	4.155		2.4	2.19	2.425	2.23	2.82	2.905
9	3.835	3.085	2.855	2.3	3.18	2.645	2.42	2.935	2.195	3.595	5.77	6.31	2.955	5.585	3.885	6.01	2.5	2.32	2.68	3.465	3.07	2.89	3.025	1.315	2.435		2.17	1.85	2.475	1.745	2.98	2.58
12	3.98	3.965	3.305	2.4	3.27	2.86	3.15	3.685	2.26	4.34	5.495	6.915	2.87	5.495	4.115	6.07	2.835	3.085	3.135	4.015	3.16	2.94	3.775	1.77	2.895		3.17	1.855	2.32	2.005	4.38	3.585
15	4.405	3.955	3.41	2.49	3.885	3.22	3.515	4.475	3.575	5.33	9.295	8.56	3.81	7.46	6.2	7.2	3.41	3.03	3.66	4.245	3.355	3.455	4.915	2.515	3.835		3.77	2.185	3.09	3	5.485	4.655
18	3.865	3.56	3.435	2.5	3.885	3.23	3.75	3.555	3.355	6.085	10.565	9.995	5.035	8.485	6.26	8.09	3.665	3.075	4.64	4.08	3.8	3.805	5.2	2.945	5.3		4.11	2.47	3.705	3.47	5.62	5.155
delta fat mass (g)
	Low Protein								High Protein
Sham	1.81	0.57	2.305	0.9	1.785	1.655	2.18	1.69	1.61	3.885	3.45	5	3.445	5.68	8.015	7.18
WP	1.5	1.755	1.48	0.17	2.045	1	2.085	1.095	3.555	3.48	2.34	0.605	2.25	1.53	3.475

## Sheet: 1F
iWAT
	Low Protein								High Protein
Control	336.2	281.7	435.2	413.4	359.3	418.5	377.6		365.5	508.2	606.1	713.9	976.2	929.9
RT	544.4	423.1	438.8	323.6	379.7	512.8			506.5	520.9	416.2	404.4	518.7	1017.3	397.5

## Sheet: 1G
eWAT
	Low Protein								High Protein
Control	609.9	484.8	625.7	704.1	605.8	764.5	761.3		725.6	1125.1	1144.4	1522.9	1871	1669.9
RT	775	721.8	660.7	693.9	639.3	801.4			1021.7	868.9	619.9	676.3	915.9	1908.5	821.7

## Sheet: 1H
BAT
	Low Protein								High Protein
Control	214.9	169.9	130.7	148.5	116.7	126.3	119		183.8	219.3	173.5	116.9	258.9	159
RT	152.8	129.8	221.6	158.7	134.4	136.4			121.7	157.1	142.8	142.5	140.9	157.7	143.4

## Sheet: 1I
liver
	Low Protein								High Protein
Control	930	792.8	877.9	839.2	832.3	930			1175.2	1289.7	1153.2	1067.5	1408.1	1400.8
RT	920.7	984.7	993.6	982.6	964.2	946.3			1122.8	1199.4	926	1038.2	1082.8	1217.5	1233.4
