# Supplementary material for: Resistance exercise protects mice from protein-induced fat accretion
Source: eLife. 2023 Nov 29;12:RP91007. doi: 10.7554/eLife.91007 (PMC10686620; doi:10.7554/eLife.91007)
Supplement: Figure 2—source data 1. [file elife-91007-fig2-data1.xlsx]

## Sheet: 2B
Lipid Droplet Size (μm2)
	Low Protein								High Protein
Control	29.451	23.179	124.418	35.726	221.049	36.734	36.571		26.655	34.24	31.163
WP	36.767	43.562	33.151	117.645	37.623	180.472	37.99		38.871	27.772	31.885

## Sheet: 2C
number of lipid droplets
	Low Protein								High Protein
Control	133	78	4626	95	3740	594	849		55	75	123
WP	73	386	146	2906	146	2714	200	3353	217	167	78

## Sheet: 2E
Adipocyte Size (μm2)
	Low Protein								High Protein
Control	1329.55	1128.32	784.501	590.188	563.487	1057.36	579.57	692.895	802.584	719.02	708.388	1022.3	836.169	1433.28	1507.33
WP	841.985	1218.67	777.749	1024.11	1226.67	998.049	1084.06	793.95	752.232	1380.34	637.34	390.388	686.92	515.566	989.591

## Sheet: 2F
Number of Adipocytes
	Low Protein								High Protein
Control	55	68	98	121	119	79	124	110	91	92	115	86	88	54	59
WP	90	70	105	88	67	77	77	94	102	57	114	174	107	150	87	36
