# Supplementary material for: Resistance exercise protects mice from protein-induced fat accretion
Source: eLife. 2023 Nov 29;12:RP91007. doi: 10.7554/eLife.91007 (PMC10686620; doi:10.7554/eLife.91007)
Supplement: Figure 3—figure supplement 1—source data 1. [file elife-91007-fig3-figsupp1-data1.xlsx]

## Sheet: S3A
Food Consumption (g/g BW/day)
	LP								HP								LP + WP								HP + WP
Light	0.030664	0.09591		0.049312	0.044006	0.010395	0.011183	0.057927	0.072083	0.055715	0.026875	0.015818	0.070435	0.029995	0.009237	0.030726	0.020233	0.02352	0.023982	0.082627	0.015522	0.031327	0.061347	0.04067	0.017889		0.035867	0.009786	0.027945	0.023679	0.057237	0.015951
Dark	0.081986	0.046983	0.065841	0.037272	0.043426	0.047714	0.047715	0.102797	0.045187	0.036276	0.061036	0.009583	0.065257	0.036162	0.045823	0.049604	0.064604	0.058717	0.066657	0.088298	0.018659	0.07764	0.024545	0.078891	0.024702		0.064969	0.054122	0.058449	0.047479	0.067803	0.057761

## Sheet: S3B
Activity (x10³)
	Low Protein								High Protein								Low Protein + WP								High Protein + WP
Light	22169	22287	16252	9468	41893	34271	23688	16213	18295	6851	11444	13642		12005	15737	3927	16684	16716	15589	22194	6965	15751	11344	22668	7034	8036	17850	13670	6890	20601	10615	13975
Dark	58101	52495	63059	55097	39215	50950	49391	31914	31940	49750	49994	48180		44286	58209	30285	33693	55918	46268	62456	27924	16340	35403	35706	55875	39981	68782	29478	45929	36010	24841	24595

## Sheet: S3C
RER over time
	Low Protein								High Protein								Low Protein WP								High Protein WP
0	0.871773	0.837901	0.95094	0.851397	0.765709	0.867522	0.714523	0.840032	0.860539	0.820251	0.709281	0.762523	0.838861	0.836264	0.84696	0.748389	0.766458	0.819128	0.925038	0.847348	0.802577	0.75961	0.727166	1.00122	0.783752	0.718425	0.880666	0.716058	0.867618	0.697261	0.799058	0.786343
1	0.708981	0.848418	0.821968	0.886187	0.674398	0.769105	0.695383	0.833573	0.870098	0.805541	0.77724	0.751522	0.839391	0.822011	0.817262	0.764316	0.720997	0.823526	0.994249	0.838985	0.796205	0.759721	0.691482	0.993811	0.734995	0.689036	0.88381	0.72216	0.869906	0.689886	0.79519	0.846967
2	0.785153	0.926526	0.855014	0.827903	0.703945	0.967151	0.717776	0.852245	0.824179	0.786631	0.735795	0.77576	0.795049	0.818394	0.795658	0.791505	0.766667	0.847247	0.97646	0.841376	0.743524	0.717631	0.771398	1.02212	0.728556	0.740618	0.886417	0.727562	0.861218	0.711159	0.788212	0.848701
3	0.729015	0.769819	0.874429	0.838054	0.816439	0.983663	0.668291	0.777557	0.803977	0.801031	0.752889	0.808104	0.799518	0.858344	0.798797	0.763559	0.730866	0.761829	0.868196	0.836987	0.718569	0.733483	0.777132	0.909035	0.731137	0.716218	0.880199	0.755197	0.758289	0.679642	0.710351	0.775628
4	0.695521	0.711318	0.754704	0.764137	0.805725	0.96009	0.673145	0.838719	0.831335	0.800123	0.714123	0.733236	0.807293	0.87001	0.815392	0.754685	0.762959	0.763642	0.824121	0.724146	0.71441	0.676554	0.720343	0.940271	0.728981	0.69888	0.825068	0.710387	0.788079	0.696912	0.747648	0.882447
5	0.775754	0.790688	0.724555	0.883357	0.820937	0.861313	0.682048	0.8697	0.810505	0.816425	0.723327	0.785561	0.85072	0.874977	0.857309	0.712621	0.799048	0.846917	0.876894	0.893253	0.776555	0.706093	0.728678	0.954713	0.737269	0.736838	0.873327	0.743585	0.760385	0.703433	0.704064	0.845924
6	0.731255	0.812371	0.719064	0.823519	0.771383	0.926727	0.676522	0.852981	0.756166	0.823995	0.718516	0.781659	0.891282	0.866196	0.845118	0.708245	0.793473	0.809142	0.899435	0.805287	0.740112	0.914214	0.689429	1.00629	0.758863	0.768863	0.86095	0.763217	0.770683	0.698163	0.766351	0.752026
7	0.848513	0.845781	0.758584	0.797397	0.741048	0.875006	0.673902	0.859792	0.84172	0.858226	0.716373	0.812647	0.89225	0.853175	0.816202	0.725335	0.802224	0.734092	0.885949	0.774211	0.741362	0.722396	0.765043	0.877473	0.804409	0.771902	0.833538	0.724646	0.733949	0.704053	0.805692	0.73573
8	0.705249	0.743263	0.69456	0.849339	0.735366	0.882921	0.667049	0.771352	0.817641	0.78753	0.709288	0.746603	0.880565	0.894951	0.787064	0.702334	0.795578	0.768614	0.978731	0.867383	0.749697	0.819793	0.708831	0.972603	0.790071	0.793588	0.861309	0.774344	0.759149	0.709718	0.827364	0.752048
9	0.892114	0.773314	0.752102	0.7363	0.779527	0.971072	0.745944	0.829696	0.837935	0.862561	0.729645	0.809409	0.83545	0.876885	0.843685	0.736541	0.779299	0.706669	0.964255	0.752771	0.806962	0.728647	0.75152	0.94382	0.79908	0.779913	0.86081	0.727521	0.722596	0.70956	0.825147	0.732431
10	0.710262	0.809874	0.810466	0.8925	0.734747	0.939214	0.691108	0.80704	0.796854	0.884167	0.716921	0.779408	0.832094	0.891005	0.850868	0.719557	0.736661	0.816746	0.838423	0.920228	0.749576	0.802261	0.709216	0.744082	0.810981	0.747191	0.812623	0.76681	0.700342	0.742407	0.811932	0.738046
11	0.876341	0.764542	0.724455	0.790205	0.833487	0.937949	0.752671	0.831507	0.807522	0.881482	0.749579	0.793632	0.875404	0.898687	0.784154	0.718152	0.814811	0.856883	0.834223	0.869312	0.788475	0.799674	0.728059	0.913701	0.855525	0.808737	0.82316	0.742959	0.716225	0.712074	0.830938	0.763185
12	0.929003	0.782085	0.741359	0.96499	0.747904	0.932752	0.764974	0.830841	0.842611	0.891672	0.751692	0.828153	0.860754	0.905875	0.788211	0.757372	0.793321	0.814346	0.943438	0.932213	0.752003	0.794622	0.783977	0.996768	0.83173	0.764866	0.86233	0.805273	0.737236	0.732545	0.873738	0.735599
13	0.828538	0.904815	0.694832	0.969111	0.823756	0.956783	0.810449	0.836101	0.855835	0.867137	0.780629	0.844584	0.885669	0.900045	0.841238	0.799862	0.867297	0.94843	0.883777	0.946202	0.841599	0.881459	0.753458	0.990428	0.84212	0.775055	0.886255	0.844163	0.763239	0.719022	0.888106	0.77073
14	0.951946	0.979515	0.848278	0.979968	0.88484	0.907306	0.844038	0.915619	0.872342	0.866008	0.781284	0.859242	0.907818	0.902675	0.848016	0.771688	0.888996	0.958203	0.862288	0.942136	0.876657	0.884475	0.803839	0.870522	0.881138	0.812607	0.889239	0.866454	0.779611	0.715212	0.866923	0.795749
15	0.946182	0.885425	0.774628	0.898629	0.909263	0.851899	0.820068	0.835487	0.885352	0.864937	0.779123	0.788888	0.862214	0.915669	0.875041	0.794213	0.854361	0.954333	0.73537	0.878528	0.862256	0.895666	0.888074	1.00756	0.872629	0.839246	0.87346	0.889464	0.789522	0.701697	0.837248	0.82959
16	0.858498	0.778729	0.768305	0.819777	0.943358	0.868037	0.873812	0.797287	0.880084	0.848718	0.769589	0.786144	0.857702	0.911339	0.85116	0.806339	0.84714	0.896425	0.874405	0.876042	0.935848	0.884264	0.938567	1.0189	0.849255	0.833528	0.862351	0.869595	0.765821	0.691104	0.841188	0.845387
17	0.858897	0.796963	0.902093	0.960463	0.952281	0.920574	0.938577	0.792917	0.850982	0.813932	0.789976	0.787784	0.877559	0.874456	0.849094	0.802529	0.834115	0.906528	0.851395	0.810478	0.922095	0.931014	0.910529	1.05469	0.830191	0.831887	0.871369	0.856993	0.749609	0.690726	0.82034	0.855337
18	0.836721	0.886241	0.90896	0.910278	0.928894	0.912238	0.87555	0.803215	0.849095	0.847335	0.799598	0.81657	0.901013	0.823497	0.818733	0.775026	0.800235	0.843954	0.961029	0.819385	0.833407	0.862288	0.973966	0.96015	0.861894	0.883015	0.866657	0.847826	0.761528	0.687369	0.828979	0.801462
19	0.832295	0.799656	0.892512	0.960295	0.82418	0.87346	0.908022	0.798078	0.817886	0.81675	0.826676	0.829081	0.860837	0.830885	0.813109	0.743548	0.830443	0.903334	0.842408	0.857544	0.93278	0.850438	0.859118	1.03328	0.796138	0.835393	0.866085	0.776902	0.750446	0.682497	0.838039	0.864993
20	0.850727	0.752014	0.902704	0.966459	0.860302	0.820456	0.843708	0.763264	0.810606	0.797337	0.810596	0.836543	0.887439	0.79733	0.80633	0.766932	0.879995	0.958152	0.730617	0.974826	0.966081	0.822696	0.913755	1.03516	0.837244	0.871018	0.889529	0.738838	0.77574	0.689819	0.873838	0.871727
21	0.813927	0.780057	0.943948	0.955874	0.972167	0.835119	0.79179	0.78457	0.823283	0.804888	0.82906	0.847655	0.900078	0.777577	0.758194	0.786274	0.853847	0.964693	0.816729	0.94763	0.964661	0.727766	0.835358	1.04794	0.813625	0.889412	0.876266	0.742417	0.765597	0.694517	0.839213	0.899852
22	0.846153	0.738346	0.940613	0.968793	0.97831	0.879753	0.802065	0.83208	0.810123	0.799298	0.833771	0.808263	0.89743	0.814693	0.816643	0.747181	0.818018	0.921219	0.853619	0.966455	0.943066	0.899487	1.0032	1.03882	0.795642	0.815952	0.872944	0.783196	0.794863	0.691768	0.845119	0.905709
23	0.750493	0.843052	0.974629	0.884678	0.973598	0.798245	0.786902	0.803395	0.811427	0.828333	0.850908	0.832847	0.861726	0.795007	0.756616	0.739928	0.826348	0.832149	0.723833	0.909069	0.841343	0.856013	1.02722	0.968208	0.812557	0.853905	0.87992	0.700046	0.740733	0.676406	0.832109	0.908883

## Sheet: SCD
RER light
	Low Protein								High Protein
Control	0.782319	0.798803	0.769855	0.83931	0.766271	0.92069	0.70132	0.829252	0.820023	0.833224	0.732757	0.784198	0.847075	0.869942	0.816294	0.738422
WP	0.774673	0.795955	0.90718	0.839584	0.755564	0.765727	0.736184	0.938769	0.775985	0.751478	0.855474	0.747512	0.790636	0.783153	0.764497	0.707705
RER dark
	Low Protein								High Protein
Control	0.85314	0.831727	0.875566	0.927449	0.9014	0.866669	0.832169	0.818201	0.843029	0.830528	0.796526	0.816423	0.877423	0.846198	0.823342	0.784239
RT	0.838132	0.908839	0.83707	0.897484	0.892676	0.85259	0.889742	1.00316	0.830639	0.829201	0.876118	0.801572	0.842367	0.847373	0.774249	0.694363

## Sheet: SCE
Heat (kcal/hr)
	Low Protein								High Protein								Low Protein WP								High Protein WP
0	0.539318	0.616078	0.614278	0.518503	0.368061	0.44903	0.563124	0.539548	0.385633	0.45329	0.365068	0.356073	0.360637	0.475476	0.529169	0.366277	0.443861	0.487153	0.599485	0.611167	0.403355		0.348558	0.508	0.397116		0.439453	0.410369	0.371226	0.357654	0.525333	0.261991
1	0.446758	0.539275	0.487486	0.533781	0.269763	0.422334	0.57137	0.455616	0.430035	0.381089	0.449807	0.375533	0.485095	0.43861	0.414861	0.445263	0.36218	0.448071	0.548995	0.436901	0.345561		0.303578	0.411578	0.394072		0.471048	0.410176	0.398152	0.495598	0.421935	0.274451
2	0.455073	0.460243	0.466547	0.454196	0.424615	0.582507	0.515665	0.468578	0.366919	0.383988	0.374617	0.346779	0.382936	0.361184	0.449669	0.449619	0.480496	0.426882	0.516931	0.390864	0.336713		0.525583	0.465293	0.351268		0.443307	0.36701	0.393142	0.406957	0.554202	0.441748
3	0.393081	0.480477	0.555573	0.524179	0.338404	0.527659	0.376647	0.430693	0.442083	0.450427	0.433255	0.360634	0.369792	0.373926	0.446248	0.35753	0.433872	0.447998	0.593708	0.509756	0.282005		0.365467	0.38444	0.402264		0.619073	0.541795	0.38921	0.319994	0.379036	0.276145
4	0.35255	0.518528	0.509604	0.427416	0.406854	0.50295	0.357373	0.428532	0.385989	0.3806	0.384602	0.349966	0.342256	0.374928	0.372362	0.417929	0.456344	0.44442	0.519466	0.4373	0.281221		0.436768	0.411161	0.335376		0.425492	0.365338	0.395307	0.314678	0.473301	0.287747
5	0.403278	0.395772	0.424805	0.418194	0.445398	0.468397	0.364136	0.45431	0.436827	0.452728	0.433694	0.319679	0.342184	0.389592	0.347049	0.387113	0.447246	0.404478	0.419649	0.426464	0.393643		0.327783	0.410929	0.365811		0.439026	0.49439	0.35705	0.438551	0.362182	0.398527
6	0.384145	0.477389	0.409539	0.418967	0.286865	0.473649	0.365904	0.440516	0.441515	0.37005	0.374972	0.331177	0.374868	0.368315	0.43741	0.345829	0.430023	0.4244	0.536676	0.480273	0.280288		0.340438	0.491707	0.323197		0.534117	0.383964	0.407031	0.330438	0.41556	0.308011
7	0.449082	0.420731	0.42819	0.393724	0.365481	0.455266	0.37949	0.551716	0.387962	0.447556	0.39489	0.425449	0.368013	0.390641	0.359296	0.431856	0.448	0.373278	0.537414	0.410722	0.305362		0.44964	0.437273	0.401512		0.451124	0.370073	0.338847	0.29764	0.387253	0.299027
8	0.357365	0.40127	0.397253	0.487662	0.28516	0.503464	0.312432	0.459312	0.370304	0.397163	0.3635	0.323957	0.463895	0.43804	0.362021	0.351106	0.423278	0.552071	0.494254	0.475115	0.314398		0.315421	0.447061	0.33327		0.419873	0.471942	0.376923	0.335696	0.437296	0.292287
9	0.531738	0.497517	0.397367	0.396092	0.406113	0.478118	0.477631	0.460581	0.41828	0.411592	0.421301	0.339693	0.4239	0.397265	0.386426	0.444386	0.37221	0.423697	0.555053	0.486673	0.380805		0.415134	0.535695	0.356229		0.500725	0.351445	0.379774	0.314227	0.38057	0.355429
10	0.361591	0.437312	0.568998	0.447684	0.28117	0.556558	0.345938	0.414479	0.349622	0.414408	0.365315	0.375858	0.3772	0.408171	0.554633	0.385422	0.355707	0.423658	0.451404	0.491045	0.288758		0.321701	0.344641	0.359591		0.428867	0.464436	0.444509	0.331926	0.352307	0.436967
11	0.513986	0.410319	0.441374	0.417983	0.496394	0.597311	0.523912	0.493625	0.413039	0.514245	0.382177	0.368617	0.34797	0.37888	0.38047	0.351752	0.340223	0.479776	0.572889	0.54066	0.382224		0.408309	0.443166	0.378922		0.394889	0.368556	0.385297	0.46162	0.380853	0.276783
12	0.54719	0.501701	0.450607	0.450773	0.351545	0.523862	0.444561	0.46504	0.438861	0.516799	0.483912	0.357507	0.43551	0.42359	0.368174	0.462883	0.4464	0.435033	0.527151	0.49895	0.326598		0.421856	0.380561	0.395561		0.461331	0.464746	0.41652	0.342883	0.429372	0.479866
13	0.511637	0.512514	0.422452	0.560593	0.431977	0.621969	0.455749	0.449774	0.485627	0.47269	0.511188	0.438218	0.414632	0.420915	0.457736	0.440617	0.465453	0.473623	0.542879	0.497703	0.410773		0.493498	0.49112	0.470678		0.467826	0.543629	0.479733	0.373307	0.412693	0.389222
14	0.577155	0.575533	0.490574	0.670358	0.454416	0.57157	0.534044	0.532315	0.620732	0.57335	0.504875	0.49918	0.470068	0.508695	0.444715	0.560957	0.488128	0.575624	0.655663	0.579961	0.423912		0.483279	0.545748	0.517366		0.476152	0.53151	0.497317	0.45035	0.454185	0.354796
15	0.640862	0.651572	0.522985	0.673164	0.56101	0.646376	0.629106	0.578843	0.626034	0.631006	0.519234	0.547786	0.60656	0.495944	0.610876	0.59711	0.539308	0.66189	0.648479	0.615502	0.484601		0.612373	0.571595	0.563008		0.603833	0.604644	0.546485	0.485993	0.463698	0.445611
16	0.699204	0.615718	0.562538	0.626446	0.575098	0.642988	0.627255	0.617051	0.611053	0.591238	0.568922	0.55252	0.587711	0.534375	0.621073	0.61383	0.565102	0.695245	0.633991	0.608922	0.523157		0.636506	0.505395	0.459195		0.558291	0.614521	0.511725	0.540422	0.457964	0.29294
17	0.695153	0.57979	0.636849	0.639108	0.520319	0.618592	0.622429	0.543507	0.576649	0.535044	0.569162	0.474299	0.540603	0.480212	0.603008	0.56162	0.553628	0.680396	0.630094	0.710105	0.506572		0.57967	0.541996	0.494699		0.620101	0.634404	0.51063	0.491354	0.432729	0.490161
18	0.66858	0.567501	0.670964	0.613992	0.581745	0.648691	0.431843	0.480348	0.470872	0.475021	0.561684	0.469379	0.522192	0.437216	0.596509	0.50668	0.442915	0.645628	0.613517	0.655322	0.367979		0.532358	0.51052	0.478031		0.488897	0.573384	0.438244	0.383995	0.462499	0.330635
19	0.521769	0.536837	0.644844	0.606307	0.362631	0.596078	0.595715	0.538699	0.434797	0.432318	0.473023	0.419859	0.452415	0.459459	0.571261	0.442808	0.405068	0.582454	0.625936	0.556652	0.512795		0.483348	0.52337	0.387868		0.638027	0.399096	0.480173	0.491171	0.465613	0.31527
20	0.589884	0.540943	0.63217	0.635828	0.498047	0.56438	0.393684	0.391129	0.470408	0.441883	0.440925	0.438004	0.426788	0.404509	0.560931	0.362211	0.394768	0.598087	0.550754	0.568846	0.530016		0.503049	0.520279	0.447011		0.613764	0.406359	0.465995	0.361175	0.49208	0.26249
21	0.500352	0.51296	0.505958	0.643421	0.487508	0.527482	0.45208	0.431849	0.442532	0.497949	0.441632	0.448474	0.43862	0.38452	0.410967	0.531766	0.400156	0.612277	0.573759	0.517037	0.484094		0.451879	0.505888	0.455231		0.568567	0.4835	0.470455	0.505909	0.566265	0.340415
22	0.516783	0.538445	0.492163	0.669582	0.40662	0.587893	0.366048	0.397666	0.486056	0.52872	0.471367	0.445235	0.511578	0.45143	0.512598	0.397746	0.385805	0.613865	0.572105	0.528736	0.385366		0.601817	0.495652	0.461198		0.449501	0.463135	0.425611	0.388124	0.558729	0.245707
23	0.503248	0.482363	0.571246	0.636367	0.38972	0.576328	0.436541	0.424665	0.583264	0.421144	0.453506	0.418867	0.445734	0.440592	0.450226	0.390156	0.423338	0.607245	0.516845	0.51154	0.389818		0.452062	0.475226	0.399522		0.520248	0.31044	0.492709	0.344136	0.350632	0.269314

## Sheet: SCF
ANCOVA body weight
	Body Weight	Low Protein	High Protein	Low Protein WP	High Protein WP
1R	25.5	0.506014
1N	25.3	0.510978
2R	25.4		0.446897
2N	25.4		0.407169
5R	24.3	0.51335
5N	21	0.535636
6R	28.3		0.460909
6N	29		0.465957
9R	23.2	0.41471
9N	23.7	0.546692
13R	22.4	0.461452
13N	24.8	0.476873
10R	24		0.439042
10N	26.9		0.426471
14R	27.2		0.468589
14N	26.5		0.463301
3R	23.9			0.437598
3N	22.8			0.520794
4R	23				0.413339
7R	26			0.55907
7N	24.2			0.522081
8R	27.4				0.502017
8N	26				0.459537
11R	22			0.388431
15R	25.2			0.451351
15N	22.5			0.473065
12R	23.9				0.431256
12N	26.1				0.397143
16R	25				0.439165
16N	21.6				0.340368
