# Supplementary material for: Resistance exercise protects mice from protein-induced fat accretion
Source: eLife. 2023 Nov 29;12:RP91007. doi: 10.7554/eLife.91007 (PMC10686620; doi:10.7554/eLife.91007)
Supplement: Figure 3—source data 1. [file elife-91007-fig3-data1.xlsx]

## Sheet: 3A
GTT curve
Time(min)	Low Protein								High Protein								Low Protein + WP								High Protein + WP
0	69	60	66	59	66	81	82	61	66	90	115	81	90	118		76	64	79	71	88	80	71	59	58	75	82	115	70	111	84	98	86
15	245	183	236	251	251	233	218	235	207	392	410	247	252	326		297	201	172	196	213	208	238	146	184	170	213	287	249	339	231	324	331
30	192	194	229	208	264	182	235	202	268	287	275	243	271	305		304	173	217	179	205	191	230	86	219	232	290	234	281	280	294	336	393
45	166	154	189	216	215	168	197	213	212	245	237	233	251	286		298	146	170	151	189	149	178	97	195	206	231	229	224	250	344	195	247
60	120	138	117	140	124	172	151	127	178	136	223	226	164	218		215	113	127	109	177	114	158	100	126	139	184	199	186	192	195	165	224
120	90	81	71	103	84	68	118	76	82	116	113	142	90	113		144	71	78	66	128	85	84	58	60	73	101	109	85	120	103	103	93
GTT AUC
	LP								HP
Sham	16763	16020	16823	18908	18615	17843	19568	17250	19935	23115	26445	24188	21135	26205		26438
RT	14648	16080	14490	20243	15645	18668	10868	15930	17085	21555	22845	21360	24668	24068	22838	26400

## Sheet: 3B
ITT curve
	Low Protein								High Protein								Low Protein + WP								High Protein + WP
0	100	100	100	100	100		100	100	100	100	100	100	100	100	100	100	100	100	100	100	100	100	100	100	100	100	100	100	100	100	100	100
15	128.244	107	73.9726	73.125	78.7879		70.0787	87.8505	82.8767	105	118.954	83.5165	74.1176	109.917	70.625	100	63.5762	108.333	98.913	111.927	66.1017	68.6957	71.4286	63.3333	98.2906	119.048	64.8438	48.8889	81.1475	60.8392	78.125	85.8896
30	41.2214	56	43.8356	36.875	43.1818		48.8189	60.7477	56.1644	85.8333	83.6601	56.044	82.3529	96.6942	73.125	78.4	49.0066	79.1667	70.6522	72.4771	50.8475	59.1304	24.6753	67.7778	85.4701	64.2857	63.2812	46.6667	82.7869	46.8531	78.75	53.9877
45	25.9542	55	53.4247	41.875	50.7576		38.5827	61.6822	52.0548	75.8333	88.2353	68.1319	65.2941	89.2562	78.75	80.8	55.6291	62.5	64.1304	70.6422	64.4068	39.1304	16.8831	56.6667	64.1026	72.2222	74.2188	50.5556	58.1967	56.6434	83.75	80.9816
60	35.8779	38	55.4794	47.5	46.9697		37.0079	63.5514	48.6301	93.3333	61.4379	73.0769	63.5294	124.793	66.875	107.2	51.6556	63.5417	59.7826	63.3028	48.3051	44.3478	49.3507	77.7778	98.2906	97.6191	82.8125	50.5556	56.5574	27.972	100	49.0797
90	57.2519	77	79.452	91.25	53.0303		55.9055	103.738	65.7534	106.667	103.268	74.1758	78.8235	121.488	93.125	112	56.2914	95.8333	77.1739	86.2385	54.2373	38.2609	74.026	133.333	85.4701	152.381	104.688	66.1111	62.2951	53.1469	126.875	90.184
ITT AUC
		Low Protein								High Protein
Control		5347	6030	5759	5466	5193		4783	6890	5697	8450	8044	6622	6688	9818	6989	8730
WP		5280	7367	6758	7294	5371	4826	4666	7317	7962	9065	7219	5071	6289	4642	8513	6520

## Sheet: 3C
Blood glucose (mg/dL)
	Low Protein								High Protein
Control	76	65	79	49	62	67	40	66	62	92	67	88	78	85	69	76
RT	50	56	57	45	35	47	44	44	73	104	71	74	68	77	80	73

## Sheet: 3D
Insulin (µU/mL)
		Low Protein								High Protein
Control		3.77841	7.07386	3.15341	3.62216	3.79261	5.49716	4.23295	4.84375	3.08239	6.2642	7.11648	6.53409	6.37784	7.57102	3.72159	5.07102
WP		3.4375	3.97727	1.80398	2.89773		4.54545	4.64489	2.31534	8.38068	5.88068	4.0483	4.81534	5.48295	5.24148		4.80114

## Sheet: 3E
HOMA2-IR
	Low Protein								High Protein
Control	0.47	0.84	0.4	0.41	0.45	0.66	0.47	0.58	0.36	0.82	0.85	0.85	0.8	0.97	0.45	0.63
WP	0.39	0.45	0.33	0.33		0.51	0.52	0.33	1.03	0.79	0.5	0.6	0.66	0.66		0.59

## Sheet: 3F
FGF21 (pg/mL)
		Low Protein								High Protein
Control		6785.4		4071.42	6678.77	9036.39				4050.18	3302.62	1536.54	3522.34	2820.25	2650.61
WP		5782.11	3638.9		5032.24	5587.77	3020.12			3973.56	2114.7	1267.66	2847.02	3880.78	3161.14

## Sheet: 3G
Ketones (mmol/L)
	Low Protein								High Protein
Control	2.5	1.7	2.3	2	1.6	2	2.2	2.2	1.3	1.4	2.2	1.8	1.8	1.6	1.8	1.9
RT	2.4	2.9	2.2	2.4	2.9	2.6	1.5	2.5	1.6	1.7	1.3	0.9	0.8	1.3	1.3	1.4

## Sheet: 3H
Triglycerides (mg/dL)
	Low Protein								High Protein
Control	82.1429	65.8571	82.1429	65.8571	55.1429	56	43.7143	54.8571	81.4286	55	81.4286	55	60	53.1429	63.7143	94.7143
RT	47.7143	104.571	73.5714	116.286	71.8571	70.5714	73.5714	116.286	122.857	122	40.8571	73	122.857	122	124.571	81.7143

## Sheet: 3I
Cholesterol (mg/dL)
	Low Protein								High Protein
Control	104.127	98.2857	88.9009	85.7078	101.713	113.862	77.3744	88.9788	106.97	110.163	94.9757	121.65	91.8605	85.9804	97.7016	98.3636
RT	69.6252	48.0518	91.4711	92.3277	111.798	110.357	116.004	124.649	122.04	105.178	107.359	82.3199	83.5271	83.1766	75.5831	74.8043
