# Supplementary material for: Resistance exercise protects mice from protein-induced fat accretion
Source: eLife. 2023 Nov 29;12:RP91007. doi: 10.7554/eLife.91007 (PMC10686620; doi:10.7554/eLife.91007)
Supplement: Figure 4—source data 1. [file elife-91007-fig4-data1.xlsx]

## Sheet: 4A
Max pull (g)
	Low Protein								High Protein
1	1050	753.333	950	946.667	928.667	776.667	996.667	996.667	886.667	1013.33	1006.67	930	813.333	1003.33	966.667	966.667
2	1100	750	913.333	866.667	1010	826.667	1000	1016.67	1040	1138.33	1046.67	925	943.333	1141.67	915	991.667
3	1181.67	911.667	1055	916.667	1021.67	888.333	1005	935	1110	1265	1128.33	1121.67	1151.67	1290	1188.33	1175
4	1241.67	1051.67	1270	1090	1088.33	975	1065	990	1283.33	1351.67	1208.33	1095	1090	1280	1261.67	1235
5	1275	1095	1290	1180	1155	1047.5	1105	1050	1370	1385.5	1305	1205	1130	1280	1220	1205
6	1295	1136.67	1316.67	1168.33	1201.67	1010	1185	1073.33	1410	1425	1348.33	1295	1176.67	1248.33	1290	1221.67
7	1468.33	1443.33	1403.33	1395	1275	1230	1258.33	1253.33	1496.67	1638.33	1415	1521.67	1223.33	1428.33	1376.67	1388.33
8	1345	1415	1450	1331.67	1311.67	1288.33	1278.33	1280	1530	1578.33	1415	1438.33	1250	1505	1430	1475
9	1378.33	1455	1456.67	1438.33	1350	1338.33	1336.67	1286.67	1478.33	1630	1435	1506.67	1275	1606.67	1478.33	1543.33
10	1425	1505	1470	1465	1250	1365	1425	1267.5	1465	1720	1257.5	1502.5	1225	1570	1450	1330
11	1478.33	1541.67	1516.67	1465	1240	1378.33	1558.33	1275	1515	1683.33	1258.33	1465	1245	1580	1605	1470
12	1445	1555	1583.33	1360	1135	1315	1565	1230	1461.67	1503.33	1355	1465	1295	1565	1365	1470
AUC Max Pull
Low Protein								High Protein
14436	13459	14408	13470	12935	12393	13497	12541	14872	16074	13998	14273	12764	15214	14381	14253

## Sheet: 4B
Average Number of sets (over 3 WP sessions per week)
	Low Protein								High Protein
1	10.3333	7.33333	8.66667	8	9.66667	6.66667	9.33333	10	9.33333	10.3333	9	8.66667	8.66667	8	7.66667	8.33333
2	8	7.66667	5.66667	6	6.33333	7.33333	7	6.33333	8	8.66667	7	7.66667	8	9.33333	9	8
3	8	9	11	9	7.33333	8.33333	7	5.66667	8.66667	7.66667	8	10	8.33333	8.66667	10	8.66667
4	7	7	6.66667	8.33333	7.66667	7.66667	7.33333	6.33333	8.66667	7	8.66667	6.33333	6.33333	6	6.66667	6.66667
5	6	7.5	7	7.5	6	6.5	6	6.5	6.5	6.5	6.5	8	6	6	6	5.5
6	7	9	7.33333	9	7	7	8.33333	8.33333	7	7.33333	7	8.66667	7	6.66667	7.66667	7.33333
7	8.66667	10	7.33333	8.33333	8	9.33333	6.33333	7.66667	7.33333	9.66667	6.66667	9	7	10	7	9
8	5.33333	5.66667	6.33333	6	6.66667	6.66667	6.33333	6	6.33333	5.66667	6	6	6	7	6.66667	6.66667
9	6.66667	7.33333	6.33333	8.66667	6.66667	8	7.33333	6.33333	5.33333	8.66667	6.33333	7.33333	6.66667	9.66667	6.66667	8.66667
10	6	6.5	6	6.5	5	6.5	7.5	5.5	6	8	4.5	6	6	6.5	7	5.5
11	7.33333	6.66667	7.33333	6	6.66667	6.33333	7.66667	7	7	6	7	6	6.66667	6	8	8.33333
12	6.5	6	6.66667	6.66667	4	5	6	5.33333	6	5.66667	8	6	7	5.5	3	6

## Sheet: 4C
Number of touches per week for each group of animal (7-11 weeks, n=5)
	Low Protein					High Protein
1	3.75	3.1875	4	1.375	2.95833	3.25	3.5625	5.3125	2.875	2.95833
2	6.25	6.0625	7.0625	5.6875	4.70833	5.375	6.75	8.125	6.8125	5.375
3	7.125	7.25	7.9375	8.5	5.91667	7.125	9.375	9.875	9.5	6.83333
4	8.375	7.75	9.625	11.25	8.41667	8.25	9.75	11.75	10.3125	8.875
5	9.25	11	11.625	13.4062	10.0625	9.75	11.5625	12.1875	12.9375	10.625
6	11.5	14.5625	13.4444	14.5625	11.5926	11.875	15.125	13.7143	9.92857	12.3125
7	13	11	12.7143	18.25	11.6667	11.75	14	13.8	13.4	11.4
8	12	12.5	11.5	19	9	12	14	12.8333	16.5	11.75
9	13	16	16.5	14	11.5		16	14.6667	15	12.6667
10	13							12.5		13.1667

## Sheet: 4D
Inverted cling (seconds)
	Low Protein								High Protein
Control	111	210	251	220	85	70	132		41	7	137	92	33	83		31
WP	250	136	123	69	6	188	168	191	104	159	0	65	328	37	147	35

## Sheet: 4E
Inverted cling ANCOVA
Body Weight (g)	LP	HP	LP + WP	HP + WP
24.6	111
21.3	210
26.4	251
26.9	220
25.1	85
25.2	70
25.7	132
27.5		41
29.1		7
31.8		137
31.3		92
28.1		33
33.4		83
36.2		31
25			250
23.8			136
24.9			123
24			69
27.9			6
29			188
23.9			168
25.7			191
30.1				104
27.9				159
27				0
30.2				65
27.8				328
34.2				37
29.3				147
31.3				35

## Sheet: 4F
Rotarod (time)
	Low Protein								High Protein
Sham	46.0333	69.8	43.5333	107.167	44.1667	49.6333	85.0333	57.5	125.7	75.4667	43.8333	22.7	103.533	39.1333	75.8667	54.6333
WP	72.8667	81.8667	47.3333	84.6667	52.1	43.2	56.9333	86.0667		62.9	42.6333	63.3667	45.9333	57.6667	47.6667	35.3

## Sheet: 4G
Rotarod ANCOVA
Body Weight (g)	Low Protein	High Protein	LP + WP	HP + WP
25.9	46.0333
25.9	69.8
24	43.5333
21.3	107.167
24	44.1667
24.7	49.6333
25.4	85.0333
26.1	57.5
26.9		125.7
28		75.4667
33.5		43.8333
33.1		22.7
27		103.533
30.5		39.1333
31.2		75.8667
30.1		54.6333
24.4			72.8667
23.1			81.8667
24.5			47.3333
22.7			84.6667
28.1			52.1
22.8			43.2
27.4			56.9333
25.9			86.0667
30.3				15.1667
28.3				62.9
26.6				42.6333
32.7				63.3667
25.7				45.9333
28.4				57.6667
29.1				47.6667
27.1				35.3
