# Supplementary material for: Resistance exercise protects mice from protein-induced fat accretion
Source: eLife. 2023 Nov 29;12:RP91007. doi: 10.7554/eLife.91007 (PMC10686620; doi:10.7554/eLife.91007)
Supplement: Figure 5—source data 1. [file elife-91007-fig5-data1.xlsx]

## Sheet: 5A
FDL weight (mg)
	Low Protein								High Protein
Control	30.9	29.3	32.05	34.2	34.9	34.05	35.6	34.6	38.6	36.05	36.8	36	36.7	36.05	33.65	33.95
WP	34.2	34.55	33.7	34.6	37.55	35.5	37.8	34.95	40.7	36.2	39.15	43.85	37.8	41.05	42.45	39.4

## Sheet: 5B
FDL weight (mg/g BW)
	Control								WP
Low Pro	1.256	1.376	1.214	1.266	1.363	1.385	1.346	1.354	1.368	1.452	1.353	1.442	1.346	1.381	1.303	1.462
High Pro	1.404	1.239	1.157	1.15	1.003	0.996	1.198	1.016	1.352	1.297	1.45	1.452	1.36	1.2	1.356	1.345

## Sheet: 5C
FDL weight (mg/gtibia length mm)
	Control								WP
Low Pro	1.818	1.542	1.781	1.849	1.837	1.792	1.978	1.922	1.9	1.919	1.774	1.922	2.03	1.972	2.1	2.056
High Pro	2.144	2.003	2.044	1.895	2.039	2.003	1.869	1.886	2.261	1.905	2.175	2.436	2.1	2.281	2.234	2.189

## Sheet: 5D
Leak
	Low Protein								High Protein
Control	10.8279	8.3776	24.3047	11.9239	11.528	12.6574		14.5783	14.3177	16.943	15.1528	7.3335	9.8338	16.0092	16.5094	13.9678
WP	9.1647	15.554	15.8781	9.9598	13.189		13.1189	8.1161	14.9668	15.0283	17.2735	11.5587	10.5717	10.3753	11.9383

## Sheet: 5E
0.25mM ADP
	Low Protein								High Protein
Control	32.2533	22.653	39.9177	29.9734	29.4532	46.4917		34.6033	27.1894	30.2904	37.9504	24.1192	32.2611	35.7431	33.8968	26.8539
WP	25.473	32.2431	39.1082	28.7374	31.3276		47.5137	43.425	37.6551	30.4568	44.0692	31.9472	25.9123	36.1913		31.1193

## Sheet: 5F
0.5mM ADP
	Low Protein								High Protein
Control	51.43	31.6642	46.934	40.1249	38.5727	64.5304		60.947	38.8723	40.3732	53.0249	38.272	46.4969	48.6083	43.7422	41.1155
WP	38.4419	45.419	48.9227	38.5519	39.1755		63.0273	52.207	48.8696	40.2315	54.462	42.1924	35.6379	51.0665		45.2632

## Sheet: 5G
5.5mM ADP (Clp)
	Low Protein								High Protein
Control	114.564	73.6673	86.9477	79.8689	72.8777	118.182		138.158	84.8357	84.2856	122.929	97.1484	90.6337	107.659	87.7258	86.9728
WP	97.7993	89.7143	92.1494	81.5117	89.4027		121.219	90.1117	152.223	107.107	117.385	90.0122	78.1503	108.833		85.7657

## Sheet: 5H
Cl + IIp
	Low Protein								High Protein
Control	158.683	103.145	107.583	102.247	94.8699	177.612		173.749	120.254	121.525	148.008	128.513	120.079	130.805	117.326	116.209
WP	128.189	146.806	111.704	108.534	120.017		196.676	121.001	195.874	134.514	149.933	115.895	101.517	155.299		116.987
