# Supplementary material for: Resistance exercise protects mice from protein-induced fat accretion
Source: eLife. 2023 Nov 29;12:RP91007. doi: 10.7554/eLife.91007 (PMC10686620; doi:10.7554/eLife.91007)
Supplement: Figure 6—source data 1. [file elife-91007-fig6-data1.xlsx]

## Sheet: 6B
Bicep Circumference (cm)
	Low Protein								High Protein
Control	2.18341		2.00748	2.00434	2.15199	2.11429	2.05774	2.11743	2.23681	2.17398	2.24624	2.19597	2.2965	2.17398	2.29336	2.21482
WP	2.25252	2.13314	2.1677	2.23053	2.13942		2.12372	2.19597	2.32478	2.26195	2.34363	2.2808	2.3185	2.41903	2.23681	2.30593

## Sheet: 6C
Forearm Circumference (cm)
	Low Protein								High Protein
Control	0.202		0.1955	0.189	0.206	0.224	0.2085	0.194	0.2165	0.194	0.204	0.2195	0.2035	0.167	0.2335	0.22
WP	0.234	0.2105	0.183	0.2025	0.215		0.215	0.2205	0.22	0.2505	0.235	0.2605	0.215	0.253	0.203	0.239
