# Supplementary material for: Resistance exercise protects mice from protein-induced fat accretion
Source: eLife. 2023 Nov 29;12:RP91007. doi: 10.7554/eLife.91007 (PMC10686620; doi:10.7554/eLife.91007)
Supplement: Figure 7—source data 1. [file elife-91007-fig7-data1.xlsx]

## Sheet: 7B
Mid-Belly CSA (mm²)
	Sham								WP
Low Pro	1.70588	2.24707	2.08316	2.00221	2.26813	1.92437	2.70258	2.38448	1.88397	1.70261	2.00859	2.63536	2.62132	2.51105	2.29214	2.90447
High Pro	2.16708	2.2904	2.33866	2.24893	2.24257	2.37264	2.46321	2.57706	1.97135	2.55794	2.64242	2.22955	2.4743	2.27342	3.11264	3.03226

## Sheet: 7C
Fibers/Cross Section
LP	HP	LP + WP	HP + WP
1374	1231	1438	1586
1543	1380	1305	1828
1384	1486	1402	1441
1363	1493	1682	1207
1589	1470	1721	1467
1335	1608	1727	1444
1741	1608	1710	1629
1683	1616	1982	1750

## Sheet: 7D
Fiber CSA (μm²)
	Sham								WP
Low Pro	1241.55	1456.3	1505.18	1468.97	1427.39	1441.48	1552.31	1416.8	1310.13	1304.68	1432.66	1566.8	1523.14	1454	1340.43	1465.43
High Pro	1760.42	1659.71	1573.79	1506.32	1525.56	1475.52	1531.85	1594.71	1242.97	1399.31	1833.74	1847.19	1686.64	1574.39	1910.77	1732.72

## Sheet: 7E
FDL Type I
	Sham								WP
Low Pro		432.941	417.059		561.345	329.176	347.712	439.358	293.725		439.118	336.303	501.086	442.039	437.005	332.471
High Pro	397.647	353.529	384.824		352.206	348.706	311.765	401.176		731.765	371.471	500.392		589.647	454.902

## Sheet: 7F
FDL Type IIA
	Sham								WP
Low Pro	392.274	439.125	440.886	491.689	442.008	479.36	441.147	473.534	590.333	599.233	523.167	502.746	677.733	587.812	511.163	573.757
High Pro	517.283	487.908	531.503	526.807	453.867	464.828	504.545	481.514	495.635	531.094	638.757	762.374	725.23	633.612	619.685	531.069

## Sheet: 7G
FDL Type IIB
	Sham								WP
Low Pro	1541.38	1815.24	1889.4	1877.23	1756.9	1714.29	1974.83	1850.57	1702.54	1655.16	1923.18	2212.63	1929.35	1825.45	1685.32	1722.9
High Pro	2417.94	2225.14	2000.59	1986.16	1978.79	1896.36	1874.54	2041.49	1471.18	1723.65	2353.9	2492.19	2179.83	2155.08	2581.03	2260.68

## Sheet: 7H
FDL Type IIX
	Sham								WP
Low Pro	705.426	932.427	948.785	834.599	914.484	1015.6	1148.16	1013.93	1152.67	1157.73	1339.69	1471.5	1267.7	1347.83	1121.1	1521.89
High Pro	1418.47	1138.72	1190.31	1179.11	1046.08	989.45	964.197	1148.89	1121.19	1269.87	1384.23	1497.51	1577.11	1265.54	1538.11	1371.99
